# Supplementary material
Source: MDPI journal article supplement (https://www.mdpi.com/2227-9040/11/6/326)
Supplement: s1 [file s1]

Supplementary Material

# Au Nanoparticles on 4-Thiophenol-Electrodeposited Carbon Surfaces for the Simultaneous Detection of 8-Hydroxyguanine and Guanine

Niloufar Soltani <sup>1,2</sup>, Qusai Hassan <sup>1,2</sup>, Meissam Noroozifar <sup>1</sup> and Kagan Kerman <sup>1,2,\*</sup>

<sup>1</sup> Department of Physical and Environmental Sciences, University of Toronto Scarborough, 1265 Military Trail, Toronto, ON M1C 1A4, Canada

<sup>2</sup> Department of Chemistry, University of Toronto, 80 St. George Street, Toronto, ON M5S 3H6, Canada

\* Correspondence: kagan.kerman@utoronto.ca; Tel.: +1-(416)-287-7249

**Table S1.** The relative atomic percentages of Au 4f, S 2p, and C 1s, for the GCE-Ph-S-AuNPs after the immobilization of AuNPs and GCE-Ph-SH before the immobilization of AuNPs.

| Peaks          | Au <sup>4f</sup> | S <sup>2p</sup> | C <sup>1s</sup> |
|----------------|------------------|-----------------|-----------------|
| Position       | Rel.At.%         | Rel.At.%        | Rel.At.%        |
| GCE-Ph-S-AuNPs | 0.3              | 0.8             | 76.5            |
| GCE-Ph-SH      | 0.0              | 6.8             | 78.4            |

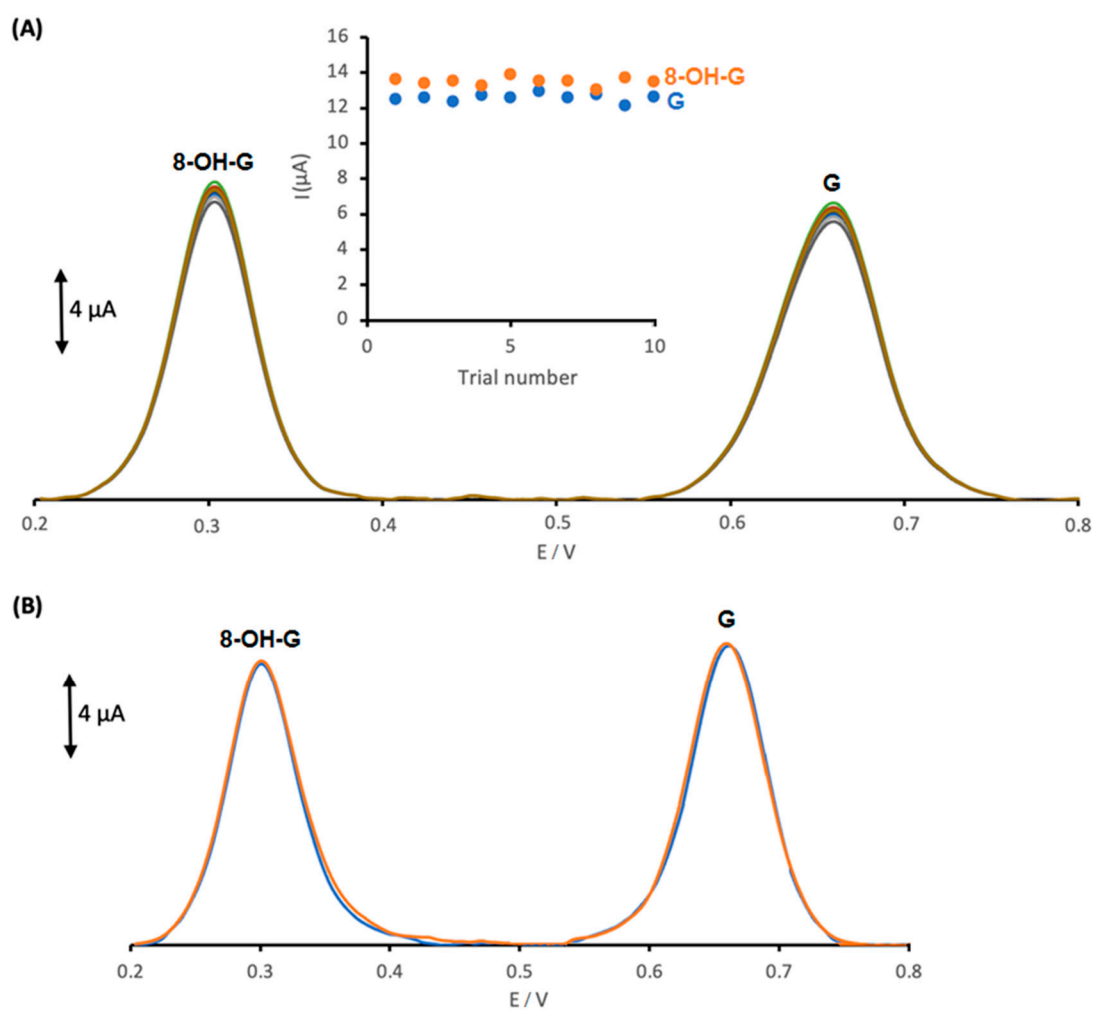

**Figure S1.** (A) Differential pulse voltammograms of 8-OH-G (150.0  $\mu\text{M}$ ) and G (40.0  $\mu\text{M}$ ) using the GCE-Ph-S-AuNPs for ten consecutive measurements ( $n=10$ ) in 0.2 M PBS (pH 7.4), (Inset; the plot for the anodic peak currents of 8-OH-G and G detected for ten consecutive measurements. (B) The stability study of the GCE-Ph-S-AuNPs for the simultaneous determination of 8-OH-G (150.0  $\mu\text{M}$ ) and G (40.0  $\mu\text{M}$ ) performed on day-1 (blue) and after storage in 0.2 M PBS (pH 7.4) for 5 months (orange).

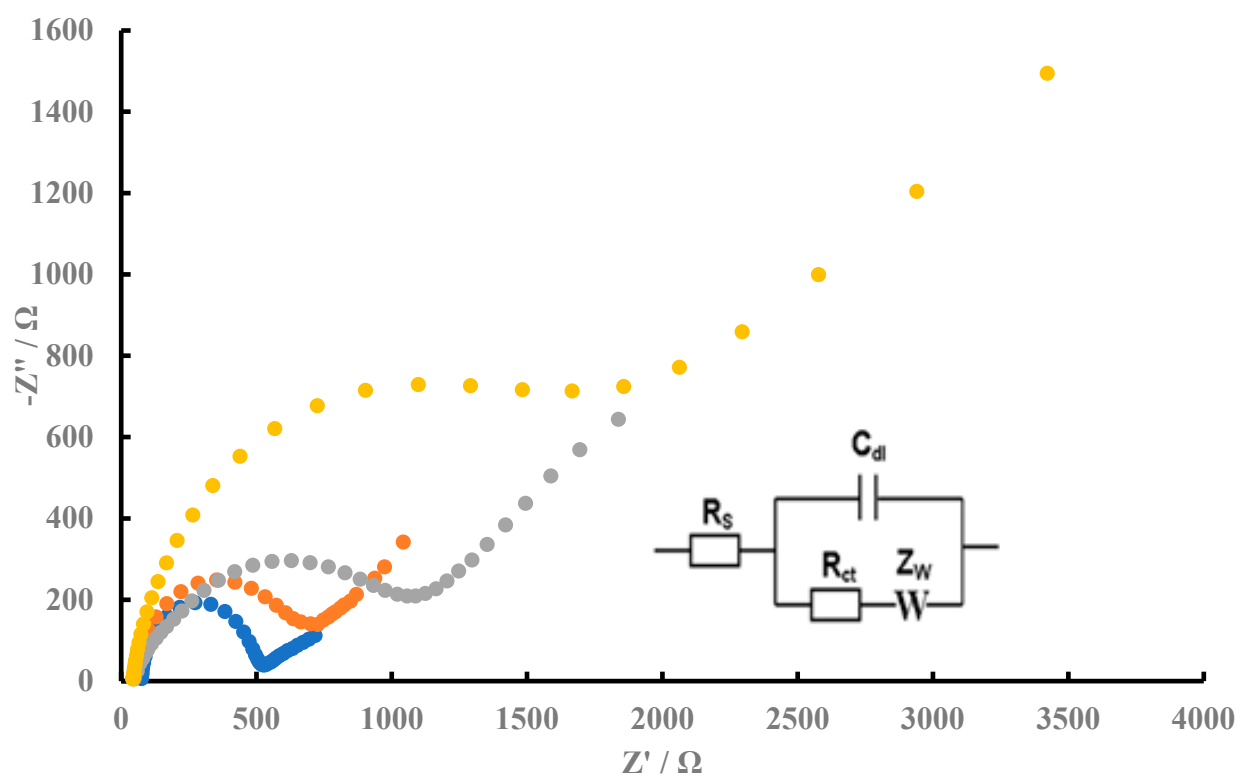

**Figure S2.** Nyquist plots were obtained with the bare GCE (yellow) and the GCE-Ph-S-AuNPs surfaces that were prepared after 2 scans (grey), 10 scans (orange), 50 scans (blue) of diazonium electrodeposition in 5 mM  $K_3Fe(CN)_6$  and 5 mM  $K_4Fe(CN)_6$  with 100 mM KCl with the frequency ranging from 0.1 Hz to 100 kHz. Inset represents the modified Randles equivalent circuit model for fitted impedance data, in which  $R_s$  is the solution resistance;  $R_{ct}$  is the charge-transfer resistance;  $C_{dl}$  is the double-layer capacitance;  $Z_W$  is the Warburg element.

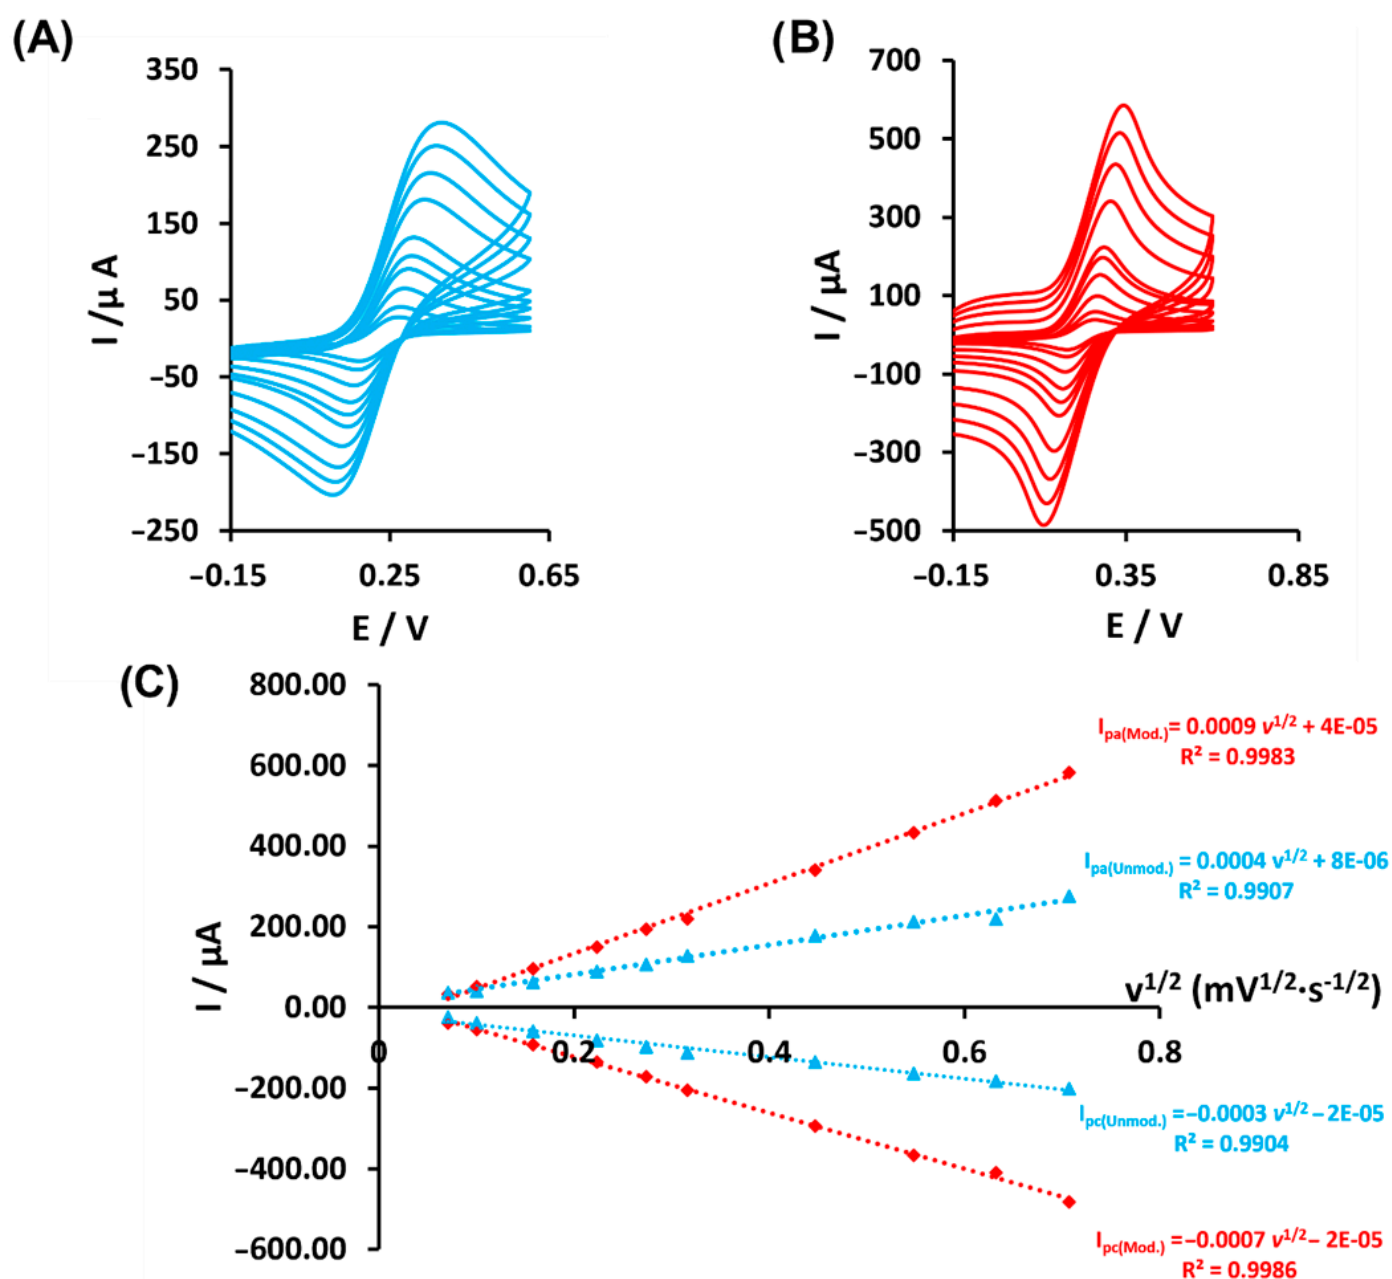

**Figure S3.** Cyclic voltammograms of (A) GCE and (B) GCE-Ph-S-AuNPs (prepared with 50 scans of diazonium electrodeposition) in 1.0 mM  $K_3[Fe(CN)_6]$  with 0.1 M KCl as the supporting electrolyte at a scan rate ranging from 5 mV/s to 500 mV/s. (C) The plot of anodic peak current vs. the square root of scan rate.

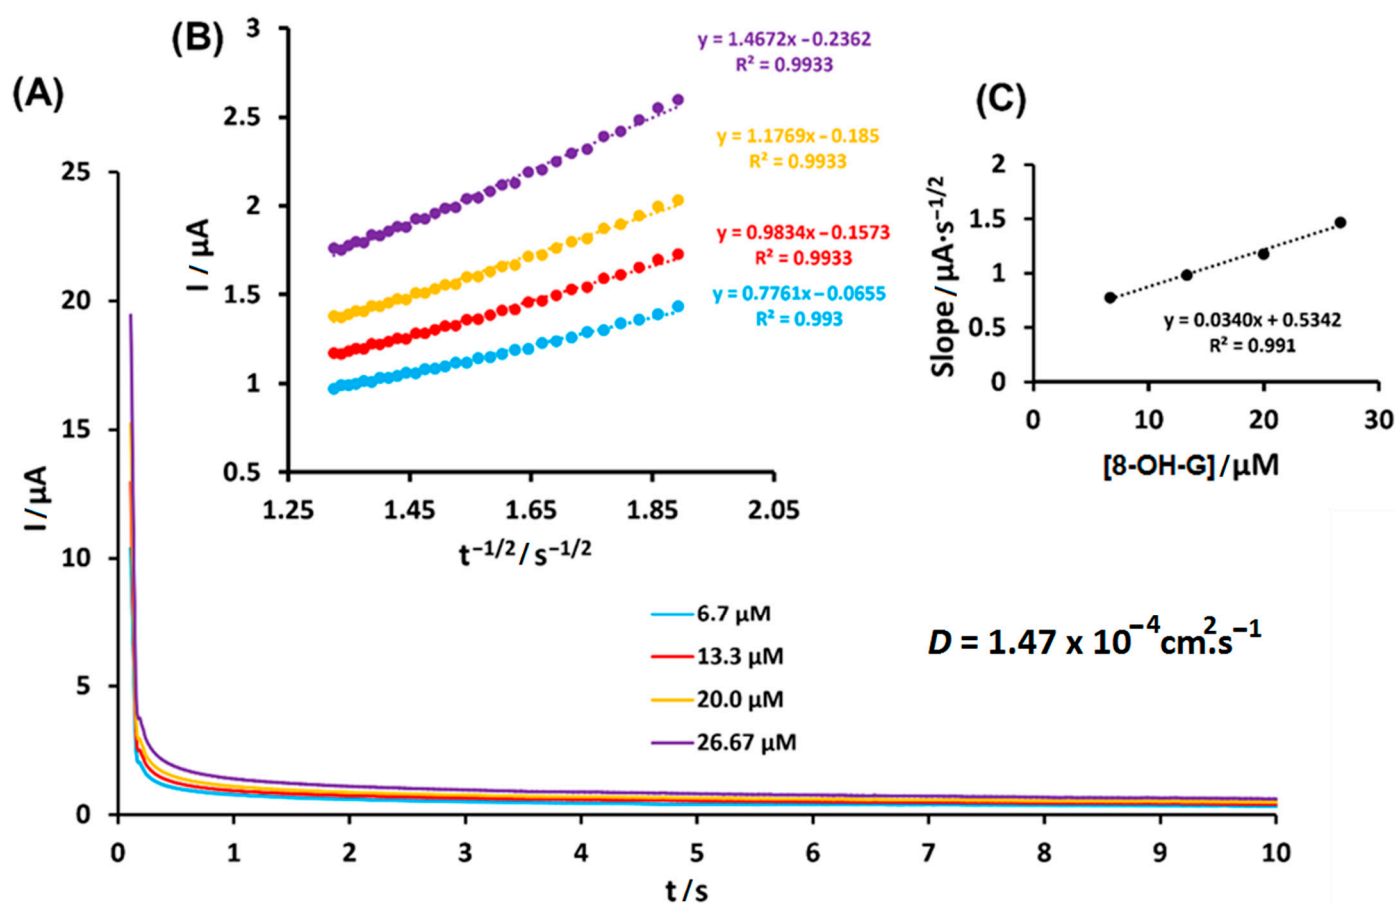

**Figure S4.** (A) Chronoamperograms obtained using the GCE-Ph-S-AuNPs (prepared with 50 scans of diazonium electrodeposition) for varying concentrations of 8-OH-G (6.7, 13.3, 20.0, and 26.7  $\mu\text{M}$ ). (B) The plot of  $I$  vs.  $t^{-1/2}$  generated using chronoamperograms. (C) The linear relationship of the slope obtained from the Cottrell plot vs. the concentration of 8-OH-G. All measurements were performed in 0.2 M PBS at pH 7.4.

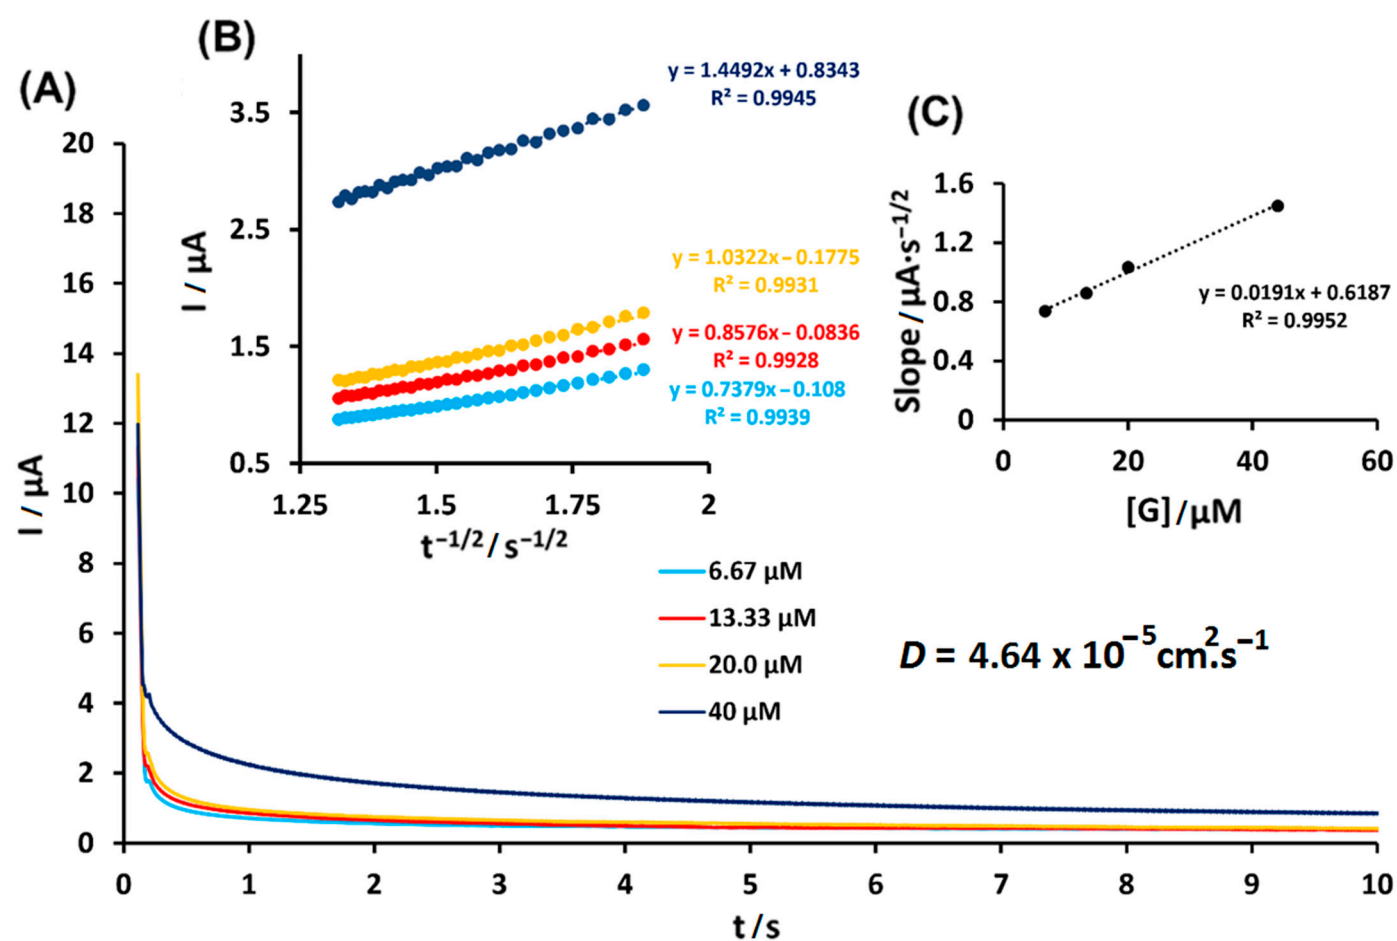

**Figure S5.** (A) Chronoamperograms obtained using the GCE-Ph-S-AuNPs (prepared with 50 scans of diazonium electrodeposition) for varying concentrations of G (6.7, 13.3, 20.0, and 40.0  $\mu\text{M}$ ). (B) The plot of  $I$  vs.  $t^{-1/2}$  generated using chronoamperograms. (C) The linear relationship of the slope obtained from the Cottrell plot vs. the concentration of G. All measurements were performed in 0.2 M PBS at pH 7.4.
